# Supplementary material for: In-Hospital Mortality from Spondylodiscitis: Insights from a Single-Center Retrospective Study
Source: MDPI journal article supplement (doi:10.3390/jcm12237228), 2023-11-22
Supplement: s1 [file s1]

| Variable                 | B         | Odds ratio | 95% CI              | p-value |
|--------------------------|-----------|------------|---------------------|---------|
| Diabetes mellitus        | 1.383     | 3.987      | 1.917 - 8.542       | 0.0002  |
| Constant                 | -3.073    | 0.04626    | 0.02519 - 0.07730   |         |
| Malignant disease        | 0.3300    | 1.391      | 0.4539 - 3.520      | 0.5322  |
| Constant                 | -2.527    | 0.07988    | 0.05273 - 0.1158    |         |
| Steroid medication       | 1.326     | 3.765      | 1.173 - 10.30       | 0.0279  |
| Constant                 | -2.607    | 0.07377    | 0-04874 - 0.1068    |         |
| Alcohol abuse            | 0.09255   | 1.097      | 0.1707 - 3.976      | 0.9045  |
| Constant                 | -2.490    | 0.08287    | 0.05592 - 0.1181    |         |
| Endocarditis             | 1.010     | 2.744      | 0.7573 - 7.921      | 0.1146  |
| Constant                 | -2.568    | 0.07671    | 0.05106 - 0.1105    |         |
| Paravertebral abscess    | 0.5443    | 1.723      | 0.8311 - 3.575      | 0.1421  |
| Constant                 | -2.720    | 0.06584    | 0.03811 - 0.1055    |         |
| Epidural empyema         | 0.1566    | 1.169      | 0.5650 - 2.421      | 0.6707  |
| Constant                 | -2.560    | 0.07729    | 0.04463 - 0.1243    |         |
| Hepatopathy              | 0.2341    | 1.264      | 0.3605 - 3.435      | 0.6836  |
| Constant                 | -2.511    | 0.08116    | 0.05399 - 0.1170    |         |
| Age (y)                  | 0.05896   | 1.061      | 1.024 - 1.105       | 0.0006  |
| Constant                 | -6.772    | 0.001145   | 4.845e-005 -0.01631 |         |
| BMI (kg/m <sup>2</sup> ) | -0.004644 | 0.9954     | 0.9193 - 1.066      | 0.9016  |
| Constant                 | -2.706    | 0.06682    | 0.009263 - 0.5390   |         |
| CRP (mg/dl)              | 0.03189   | 1.032      | 0.9993 - 1.065      | 0.0548  |
| Constant                 | -2.917    | 0.05410    | 0.02905 - 0.09423   |         |
| CCI                      | 0.3681    | 1.445      | 1.253 - 1.681       | <0,0001 |
| Constant                 | -4.458    | 0.01159    | 0.004025 - 0.02918  |         |
| GFR (ml/min)             | -0.02038  | 0.9798     | 0.9678 - 0.9916     | 0.0008  |
| Constant                 | -1.171    | 0.3099     | 0.1370 - 0.6560     |         |

Supplementary Table S1

| Variable              | B        | Odds ratio | 95% CI           | p-value |
|-----------------------|----------|------------|------------------|---------|
| Age (y)               | -0.06477 | 0.9373     | 0.8945 - 0.9767  | 0.0038  |
| Alcohol abuse         | -1.224   | 0.2942     | 0.06293 - 2.117  | 0.1521  |
| Diabetes mellitus     | 1.476    | 4.375      | 2.025 - 9.814    | 0.0002  |
| Epidural empyema      | 0.08872  | 1.093      | 0.4938 - 2.436   | 0.8263  |
| Paravertebral abscess | -0.6647  | 0.5144     | 0.2251 - 1.163   | 0.1099  |
| Endocarditis          | -0.8495  | 0.4276     | 0.1275 - 1.723   | 0.1916  |
| Steroid medication    | -1.317   | 0.2679     | 0.08633 - 0.9428 | 0.0281  |
| Constant              | 6.884    | 976.6      | 41.68 - 38209    | <0.0001 |

Supplementary Table S2
